# Supplementary material for: Serum Vitamin D as a Marker of Impaired Information Processing Speed and Early Disability in Multiple Sclerosis Patients
Source: MDPI journal article supplement (doi:10.3390/brainsci11111521), 2021-11-17
Supplement: s1 [file s1]

## SUPPLEMENTARY MATERIAL

**Table S1. Multiple regression analyses.**

Multiple regression analyses performed to identify the best predictors of slowed IPS. The model includes vitamin D level, age at diagnosis, gender, educational level, EDSS at diagnosis, type of MS, and MRI characteristics (brain, spinal cord, and gadolinium) at baseline as independent variables; SDMT raw value as dependent variables. *Abbreviations:* df : degrees of freedom, EDSS: expanded disability status score, gd : gadolinium, MS : multiple sclerosis, SC spinal cord , SDMT: symbol digit modalities test, SE: standard error, WMLL white matter lesion load.

### Model Summary

| R                 | R2   | adjusted R2 | SE of the estimate | R2 change | Change statistics |     |     | Sign. F change |
|-------------------|------|-------------|--------------------|-----------|-------------------|-----|-----|----------------|
|                   |      |             |                    |           | F change          | df1 | df2 |                |
| ,617 <sup>a</sup> | ,381 | ,302        | 12,73025           | ,381      | 4,846             | 9   | 71  | ,000           |

a. Predictors: (constant), EDSS at diagnosis, brain WMLL, Gd status, SC involvement, gender, age at diagnosis, educational level, MS subtype, Vitamin D

### ANOVA<sup>a</sup>

|            | Sum of Squares | df | Mean square | F     | Sign.             |
|------------|----------------|----|-------------|-------|-------------------|
| Regression | 7067,354       | 9  | 785,262     | 4,846 | ,000 <sup>b</sup> |
| Residual   | 11506,201      | 71 | 162,059     |       |                   |
| Total      | 18573,556      | 80 |             |       |                   |

a. Dependent variable: RAW SDMT

b. Predictors: (constant), EDSS at diagnosis, brain WMLL, Gd status, SC involvement, gender, age at diagnosis, educational level, MS subtype, Vitamin D

### Coefficients<sup>a</sup>

|                   | Unstandardized coefficients |           | Standardized coefficients | t      | Sign. | 95% CI for B |             |
|-------------------|-----------------------------|-----------|---------------------------|--------|-------|--------------|-------------|
|                   | B                           | St. Error |                           |        |       | Lower bound  | Upper bound |
| (Constant)        | 25,423                      | 16,603    |                           | 1,531  | ,130  | -7,682       | 58,529      |
| Vitamin D         | ,465                        | ,178      | ,267                      | 2,607  | ,011  | ,109         | ,820        |
| brain MRI WMLL    | -4,275                      | 3,065     | -,140                     | -1,395 | ,168  | -10,387      | 1,837       |
| Gd status         | 2,474                       | 2,986     | ,082                      | ,828   | ,410  | -3,480       | 8,427       |
| SC involvement    | ,122                        | 3,115     | ,004                      | ,039   | ,969  | -6,090       | 6,334       |
| Educational level | 1,616                       | ,514      | ,346                      | 3,148  | ,002  | ,593         | 2,640       |
| Gender            | 1,755                       | 3,337     | ,055                      | ,526   | ,601  | -4,900       | 8,409       |
| MS subtype        | 1,472                       | 2,355     | ,064                      | ,625   | ,534  | -3,224       | 6,167       |
| Age at diagnosis  | -,315                       | ,130      | -,244                     | -2,423 | ,018  | -,574        | -,056       |
| EDSS at diagnosis | 2,588                       | 2,110     | ,146                      | 1,226  | ,224  | -1,620       | 6,796       |

a. Dependent Variable: RAW SDMT

Multiple regression analyses performed to identify the best predictors of slowed IPS (when condidering corrected values for age, gender and educational level). The model includes vitamin D level, EDSS at diagnosis, type of MS, and MRI characteristics (brain, spinal cord, and gadolinium) at baseline as independent variables; SDMT Z-score as dependent variable. *Abbreviations:* df : degrees of freedom, EDSS: expanded disability status score, gd : gadolinium, MS : multiple sclerosis, SC spinal cord , SDMT: symbol digit modalities test, SE: standard error, WMLL white matter lesion load.

### Model Summary

| R                 | R2   | adjusted R2 | SE of the estimate | R2 change | F change | Change statistics |     | Sign. F change |
|-------------------|------|-------------|--------------------|-----------|----------|-------------------|-----|----------------|
|                   |      |             |                    |           |          | gl1               | gl2 |                |
| ,425 <sup>a</sup> | ,180 | ,114        | 1,22388            | ,180      | 2,715    | 6                 | 74  | ,019           |

a. Predictors: (costant), EDSS at diagnosis, brain MRI WMLL, Gd status, SC involvement, MS subtype, vitamin D

### ANOVA<sup>a</sup>

|            | Sum of squares | gl | Mean square | F     | Sign.             |
|------------|----------------|----|-------------|-------|-------------------|
| Regression | 24,400         | 6  | 4,067       | 2,715 | ,019 <sup>b</sup> |
| Residual   | 110,843        | 74 | 1,498       |       |                   |
| Total      | 135,242        | 80 |             |       |                   |

a. Dependent Variable: SDMT Z-score

b. Predictors: (costant), EDSS at diagnosis, brain MRI WMLL, Gd status, SC involvment, MS subtype, vitamin D

### Coefficients<sup>a</sup>

|                   | Unstandardized coefficients |      | Standardized coefficients<br>Beta | t      | Sign. | 95% CI for B |             |
|-------------------|-----------------------------|------|-----------------------------------|--------|-------|--------------|-------------|
|                   | B                           | SE   |                                   |        |       | Lower bound  | Upper bound |
| (Costant)         | -1,246                      | ,867 |                                   | -1,438 | ,155  | -2,973       | ,481        |
| Vitamin D         | ,052                        | ,017 | ,351                              | 3,122  | ,003  | ,019         | ,085        |
| brain MRI WMLL    | -,506                       | ,288 | -,194                             | -1,760 | ,083  | -1,079       | ,067        |
| Gd status         | ,353                        | ,279 | ,136                              | 1,265  | ,210  | -,203        | ,908        |
| SC involvement    | ,037                        | ,294 | ,014                              | ,126   | ,900  | -,549        | ,622        |
| MS subtype        | -,108                       | ,216 | -,055                             | -,502  | ,617  | -,538        | ,321        |
| EDSS at diagnosis | ,088                        | ,181 | ,058                              | ,484   | ,630  | -,273        | ,449        |

a. Dependent Variable: SDMT Z-score
